# Supplementary material for: Tumor-associated macrophages confer colorectal cancer 5-fluorouracil resistance by promoting MRP1 membrane translocation via an intercellular CXCL17/CXCL22–CCR4–ATF6–GRP78 axis
Source: PubMed Central journal article supplement (PMC10474093; doi:10.1038/s41419-023-06108-0), 2023-09-01
Supplement: 41419_2023_6108_MOESM1_ESM.pdf [file 41419_2023_6108_MOESM1_ESM.pdf]

Fig 2E

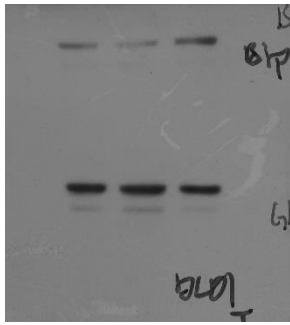

DLD1

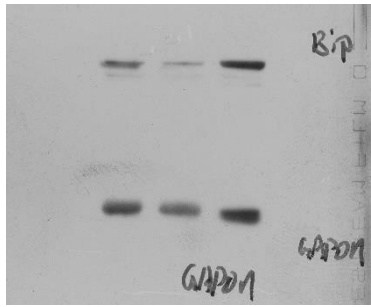

SW480

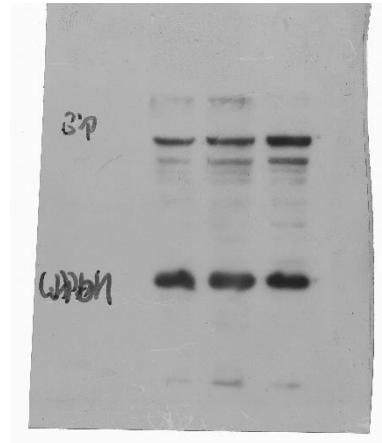

SW620

Fig 2F

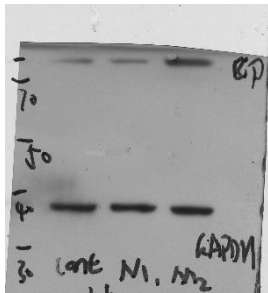

Fig 2G

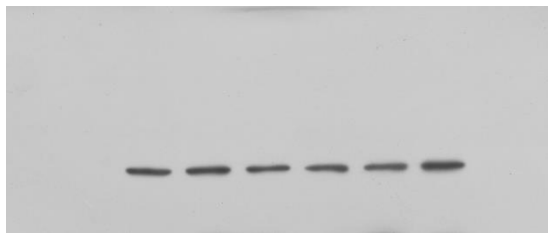

GAPDH

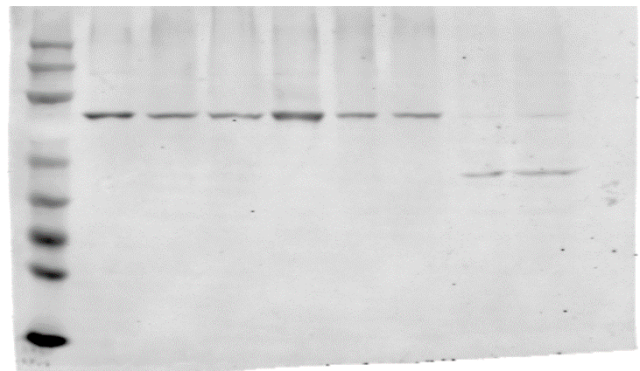

Fig 3E

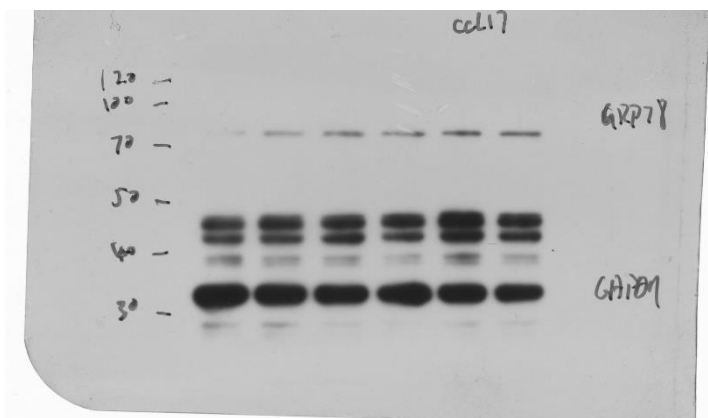

CCL17

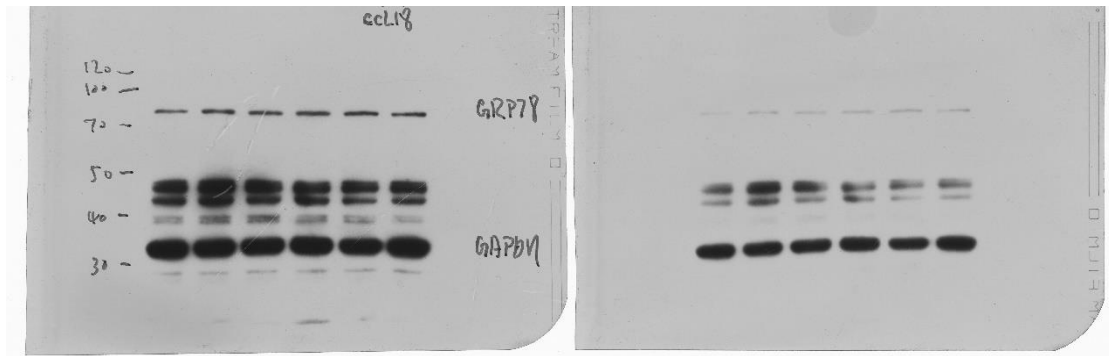

CCL18

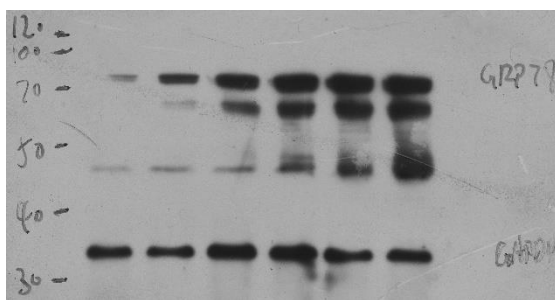

CCL22

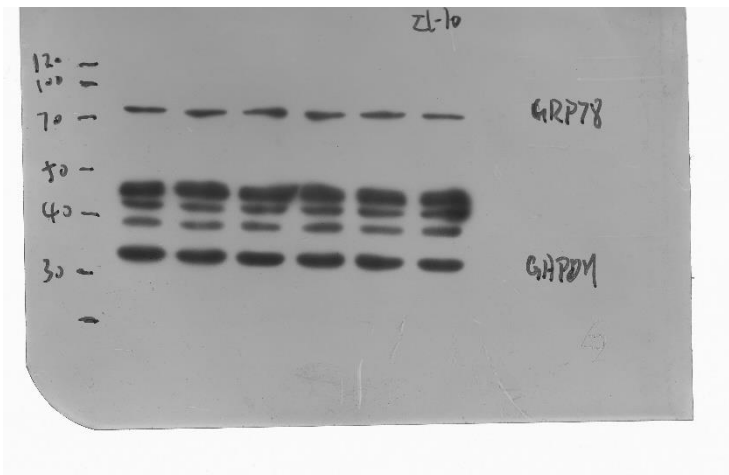

IL-10

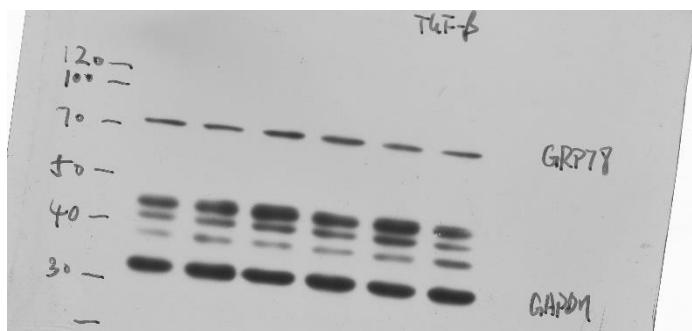

TGF- $\beta$

Fig 3F

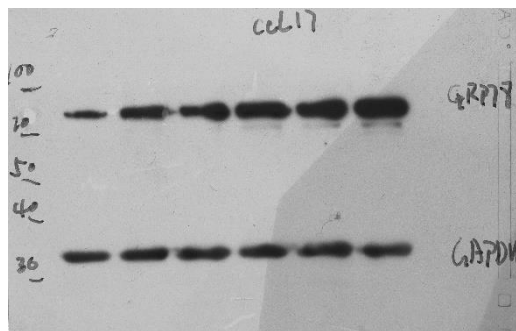

CCL17

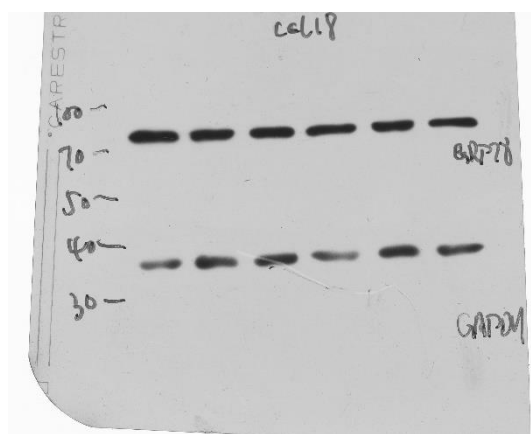

CCL18

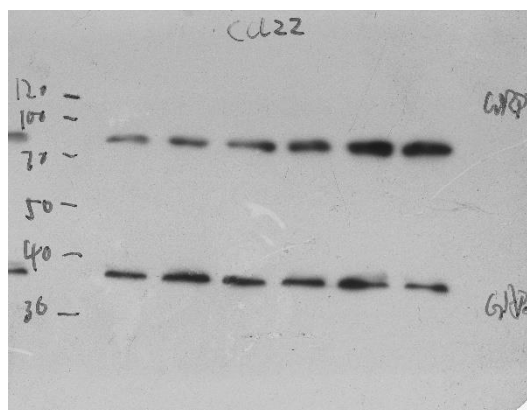

CCL22

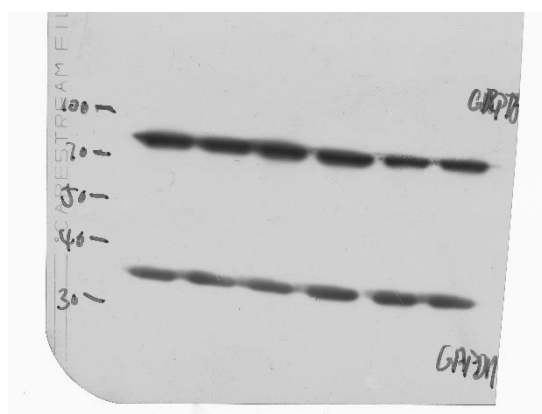

IL-10

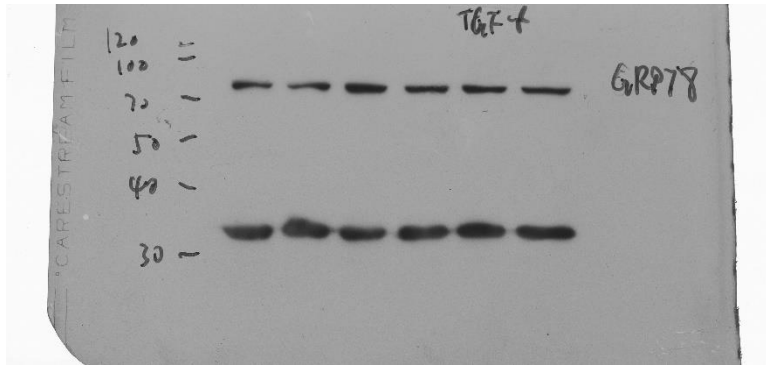

TGF- $\beta$

Fig 3G

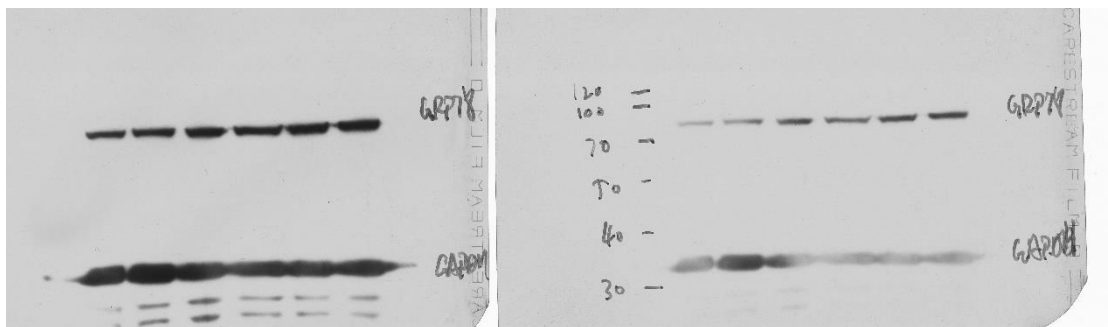

CCL17

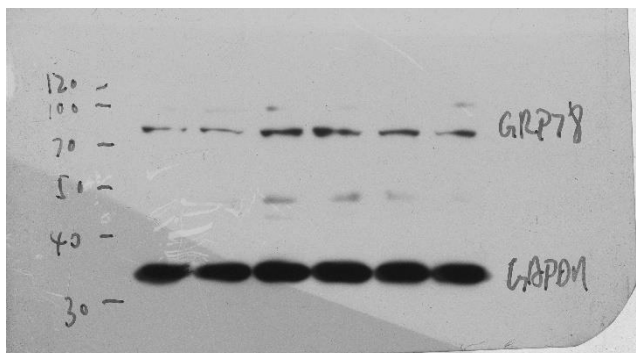

CCL22

**Fig 3J**

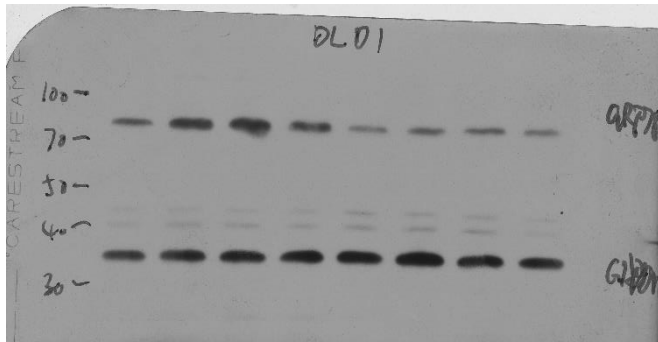

**DLD1**

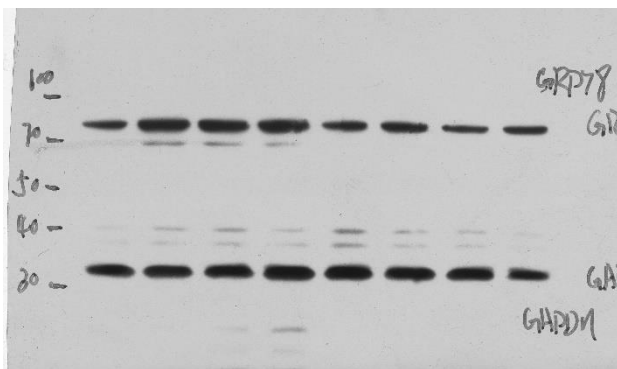

**SW480**

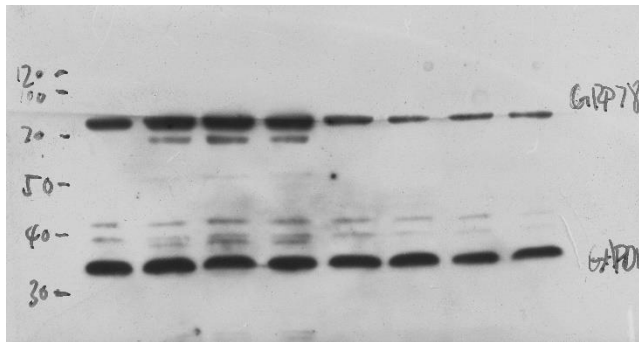

**SW620**

**Fig 3K**

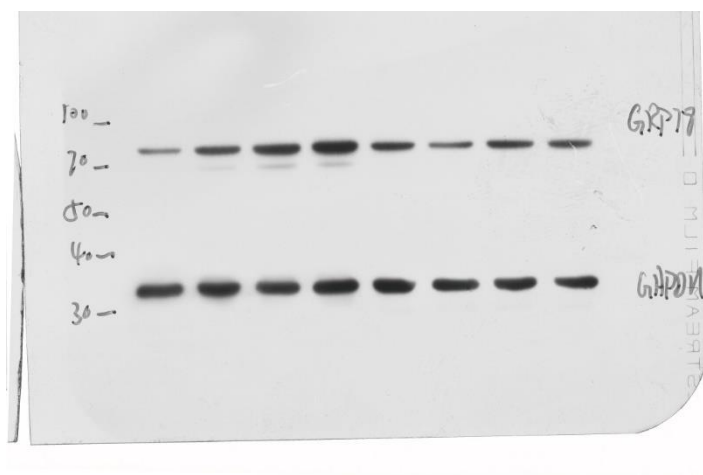

Fig 4C

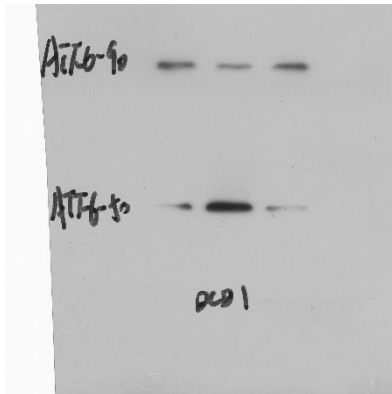

DLD1-ATF6

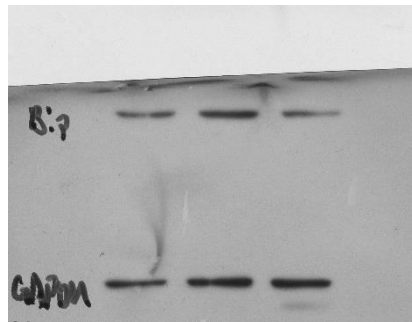

DLD1-GRP78-GAPDH

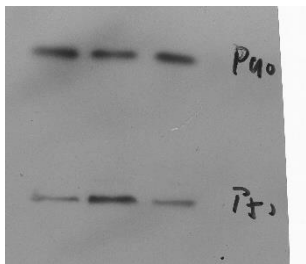

SW480-ATF6

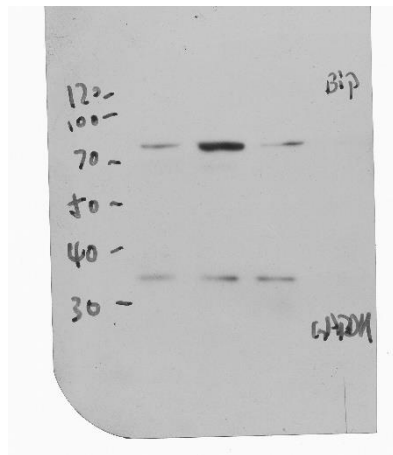

SW480-GRP78-GAPDH

Fig 4D

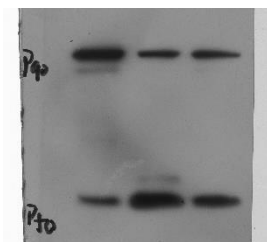

ATF6

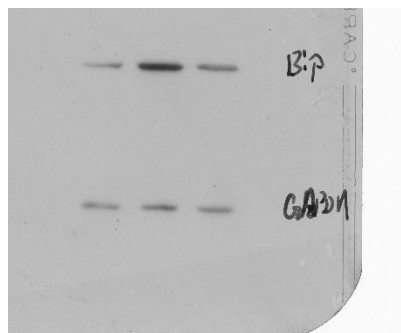

Fig 4E

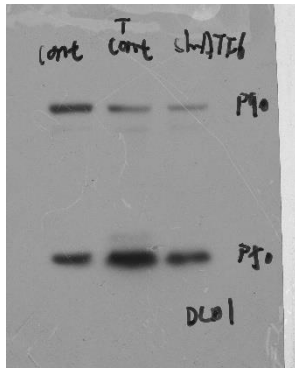

DLD1-ATF6

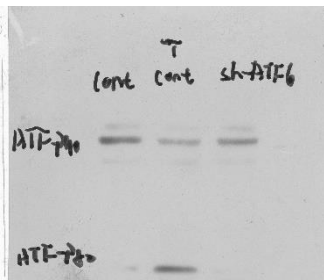

SW480-ATF6

GRP78-GAPDH

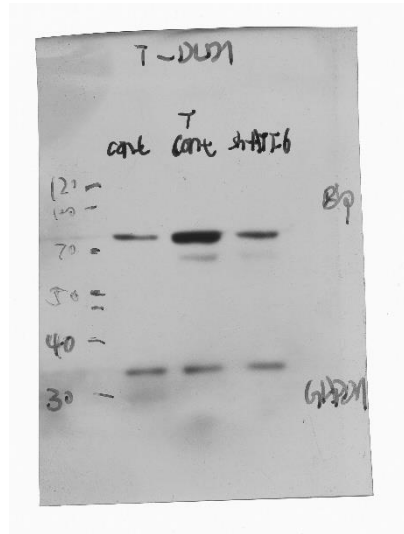

DLD1-GRP78-GAPDH

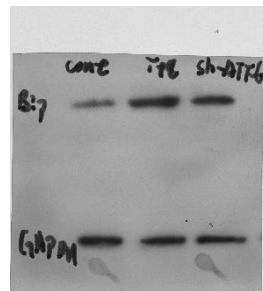

SW480-GRP78-GAPDH

Fig 5A

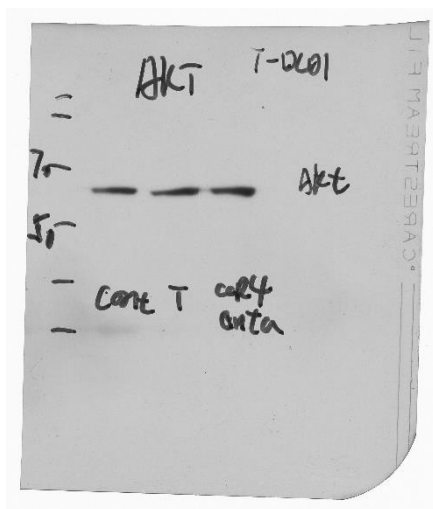

DLD1-AKT

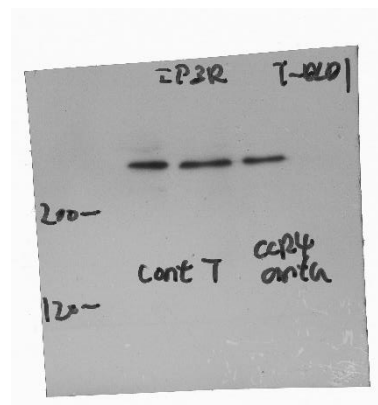

DLD1-IP3R

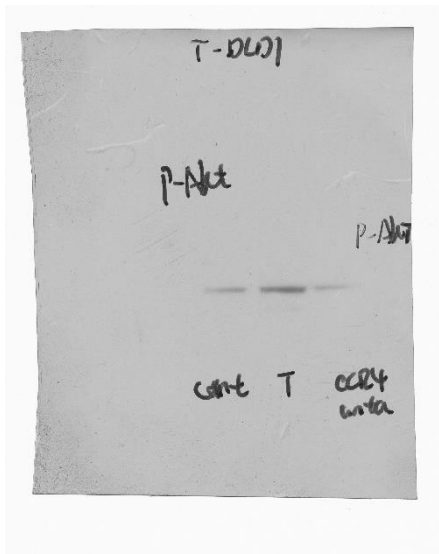

DLD1-p-AKT

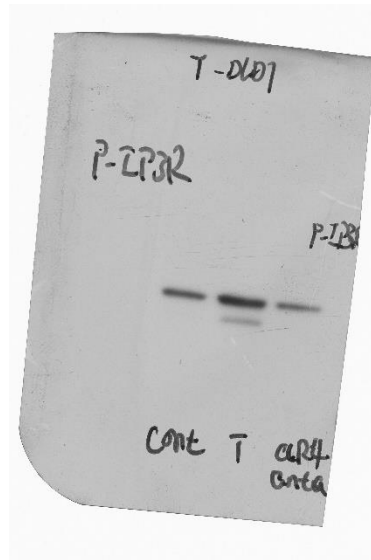

DLD1-p-IP3R

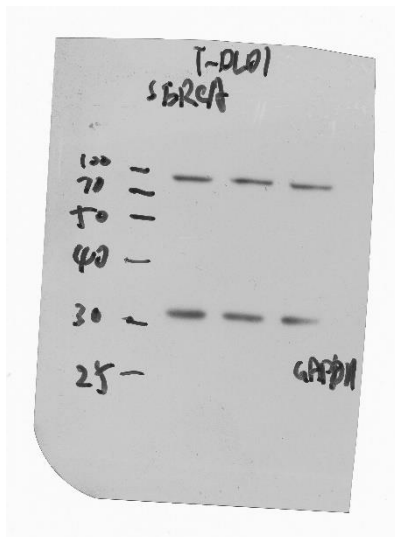

DLD1-SERCA-GAPDH

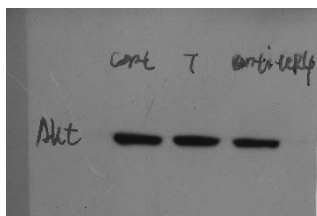

SW480-AKT

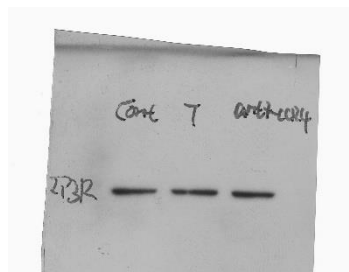

SW480-IP3R

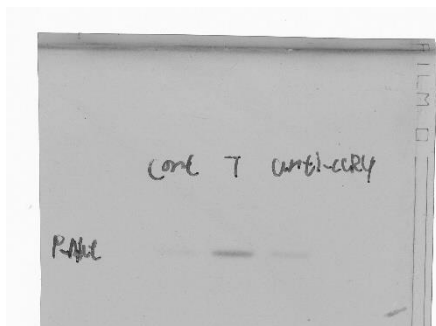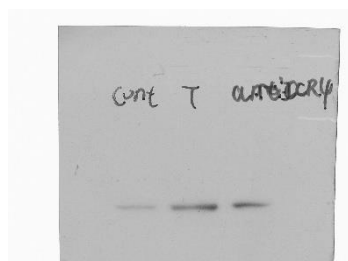



SW480-p-AKT

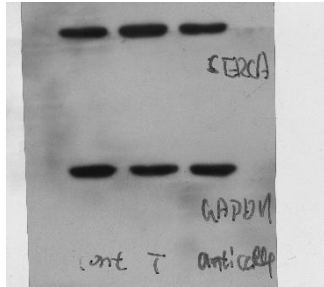

SW480-p-IP3R

SW480-SERCA-GAPDH

Fig 5C

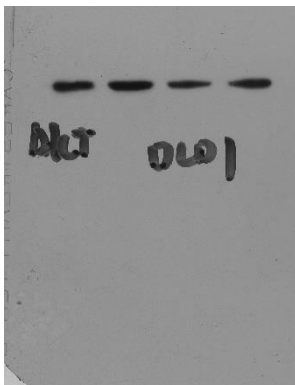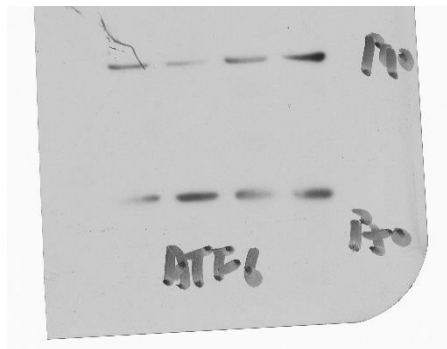

DLD1-AKT

DLD1-ATF6

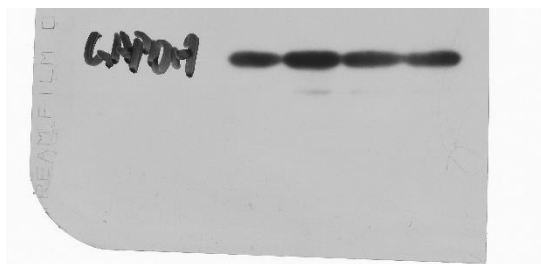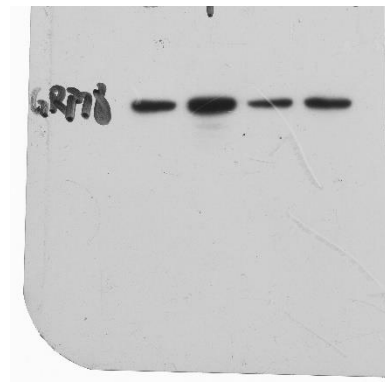

DLD1-GAPDH

DLD1-GRP78

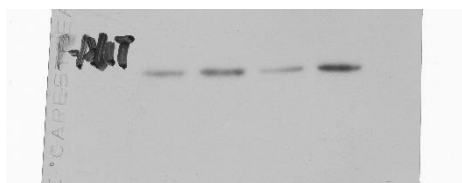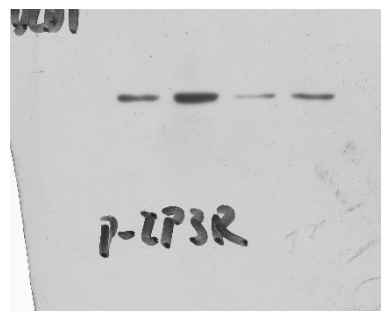

DLD1-p-AKT

DLD1-p-IP3R

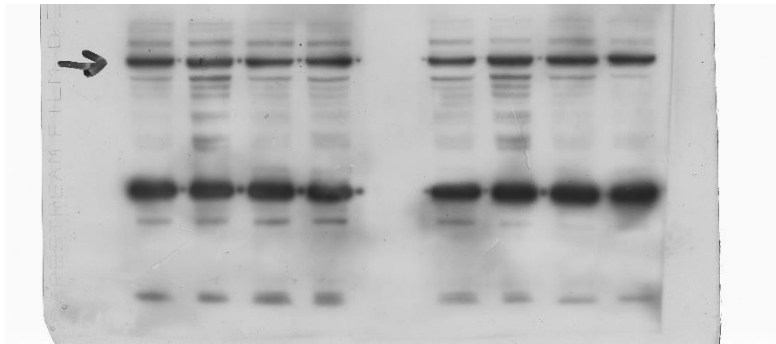

IP3R

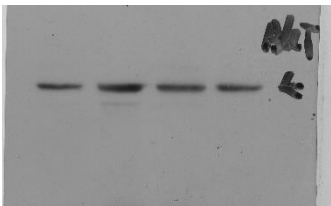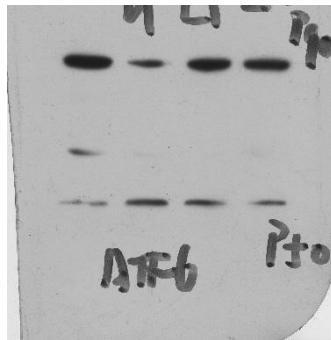

SW480-AKT

SW480-ATF6

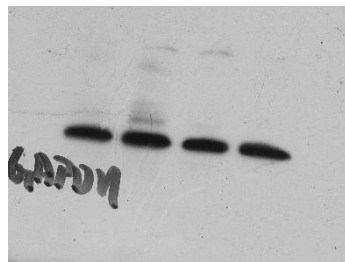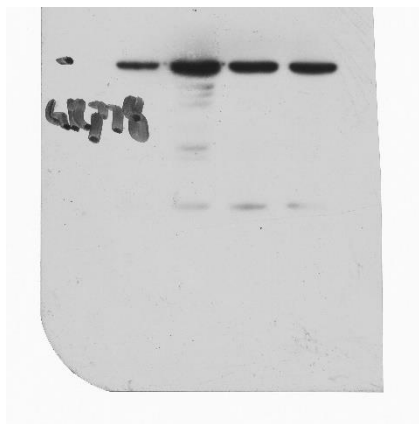

SW480-GAPDH

SW480-GRP78

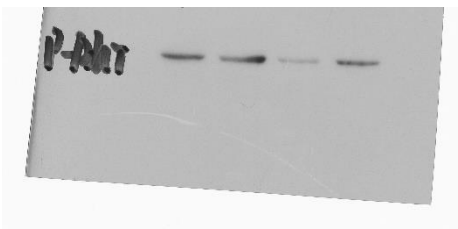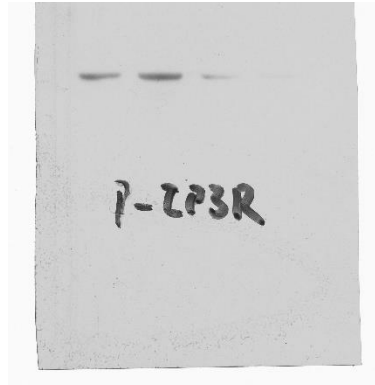

SW480-p-AKT

SW480-p-IP3R

Fig 6C

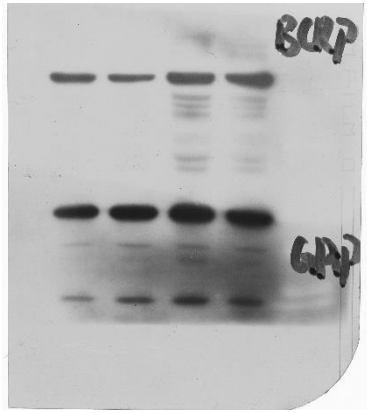

BCRP-GAPDH

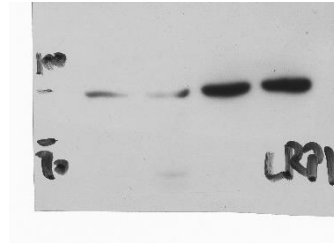

LRP1

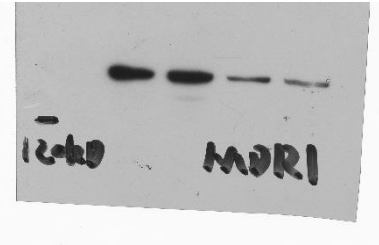

MDR1

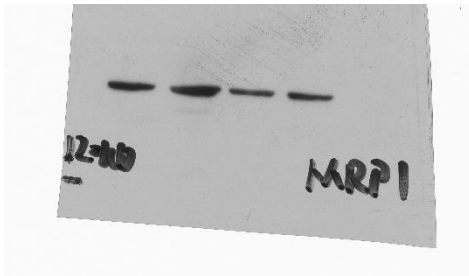

MRP1

Fig 6D

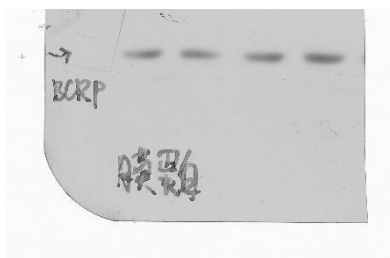

BCRP

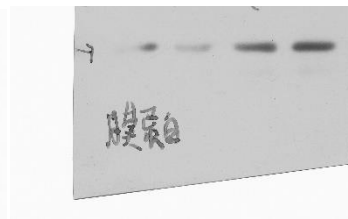

LRP

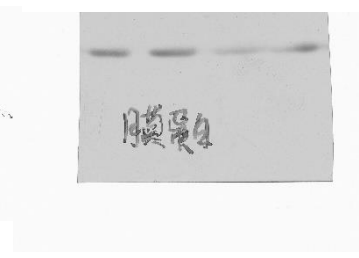

MDR1

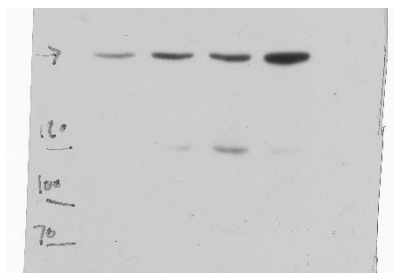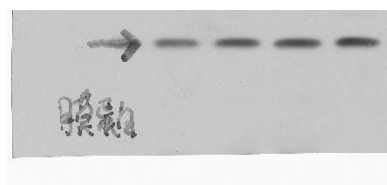

MRP1

Na-K-ATPase

**Fig 6E**

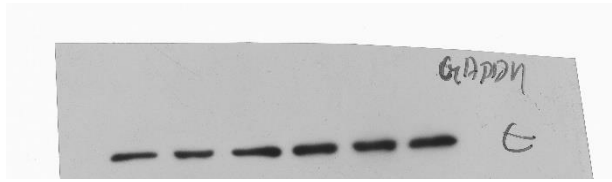

GAPDH

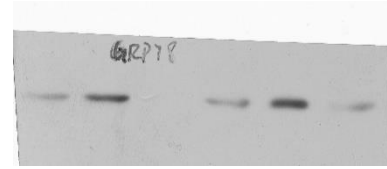

GRP78

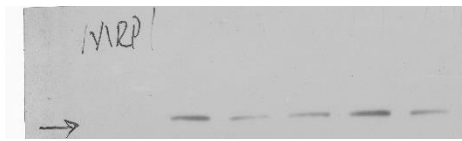

MRP1

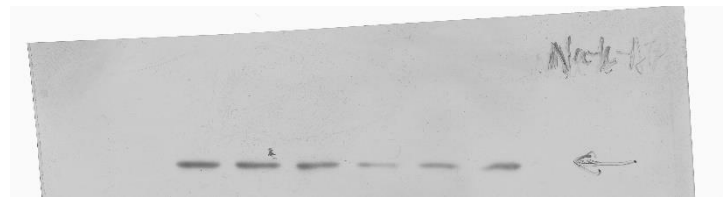

Na-K-ATPase

**Fig 6J**

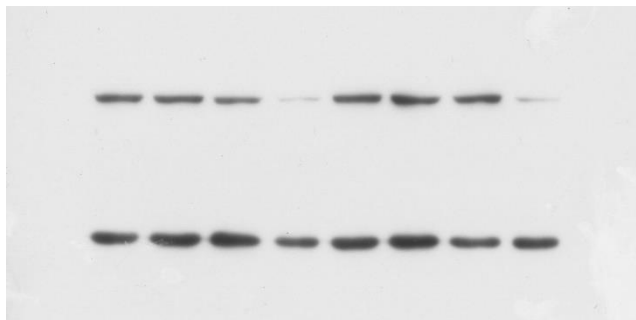

**Fig 7A**

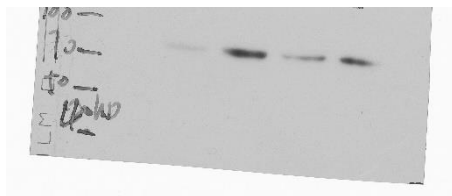

GRP78

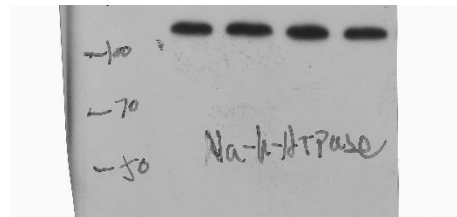

Na-K-ATPase

Fig 7C

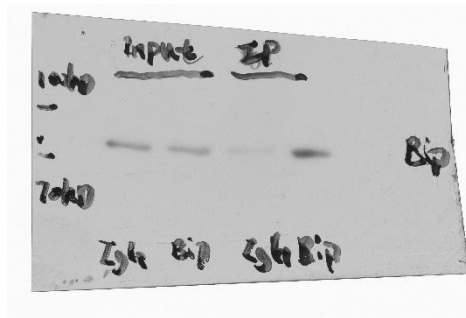

GRP78

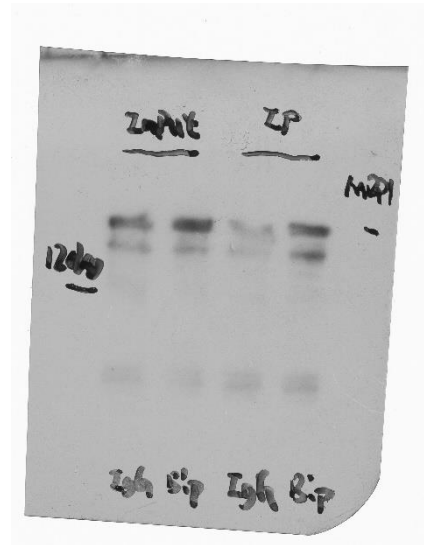

MRP1

Fig 7D

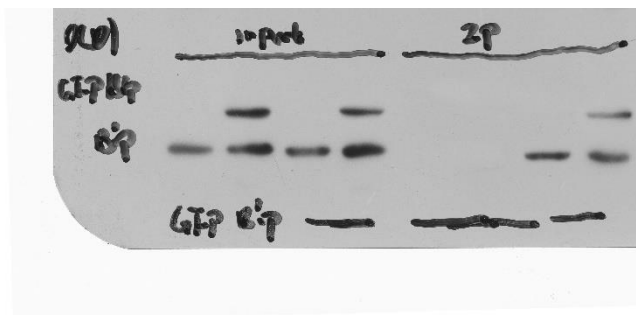

GRP78

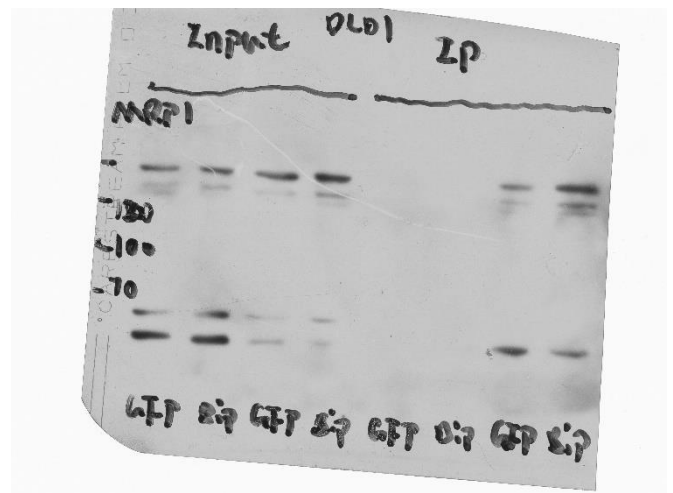

MRP1

Fig 7F

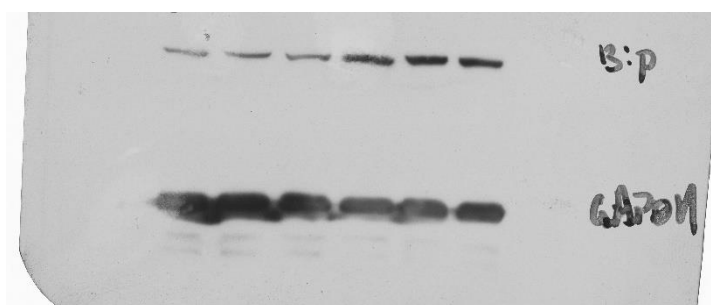

H-GRP78-GAPDH

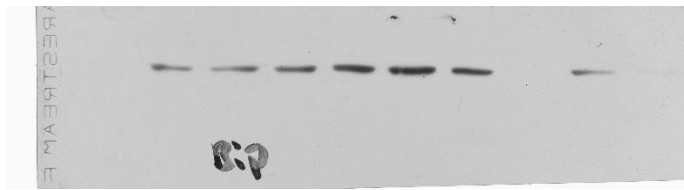

T-GRP78

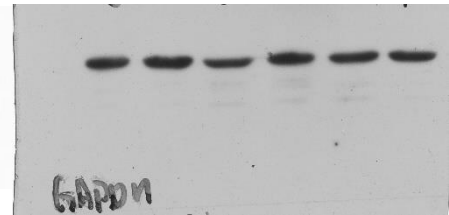

T-GAPDH

Fig 7G

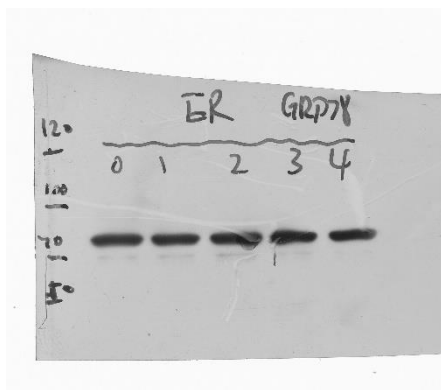

ER-GRP78

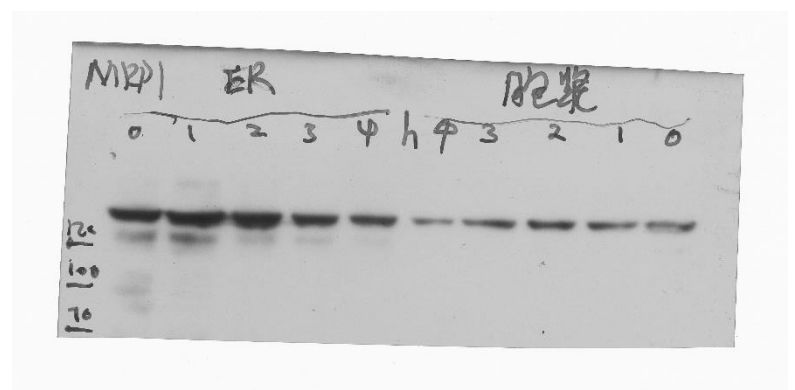

ER-plasm-MRP1

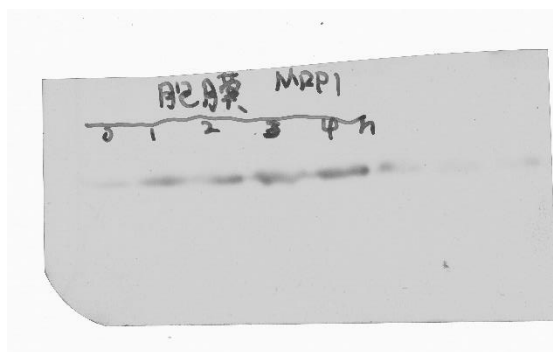

Memb-MRP1

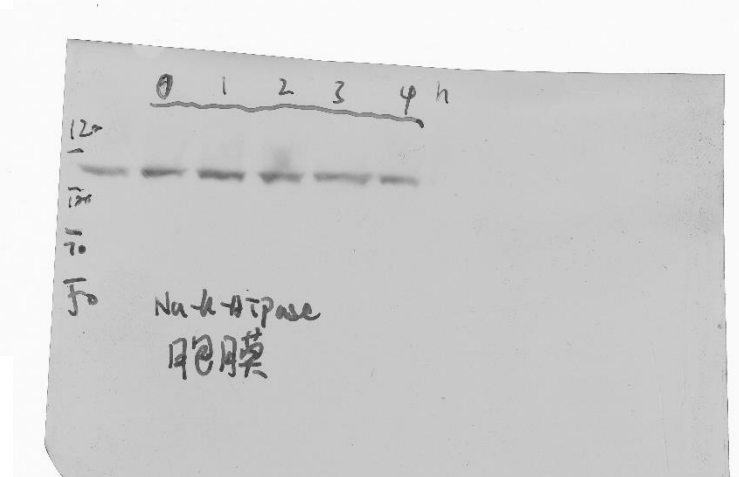

memb-Na-K-ATPase

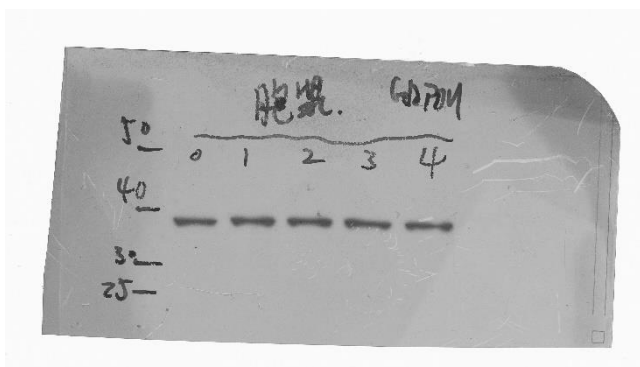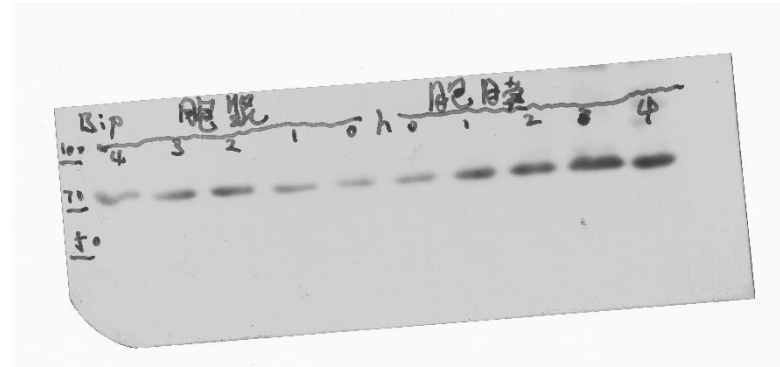

Plasm-GAPDH

Fig 7H

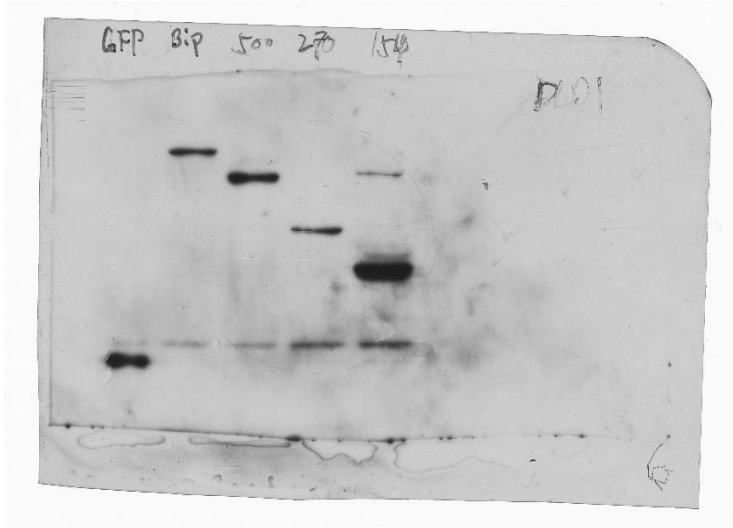

DLD1-GRP78

plasm-memb-GRP78

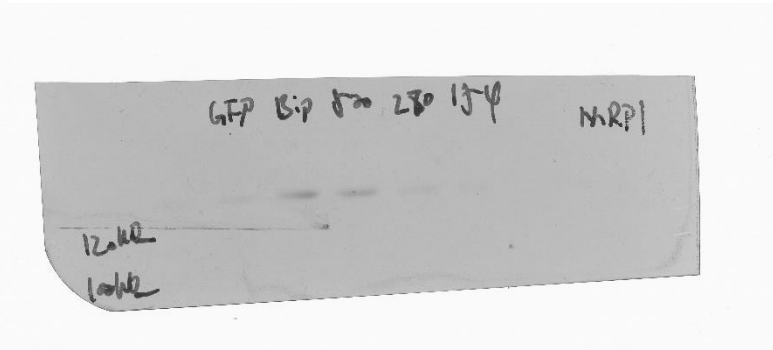

DLD1-MRP1

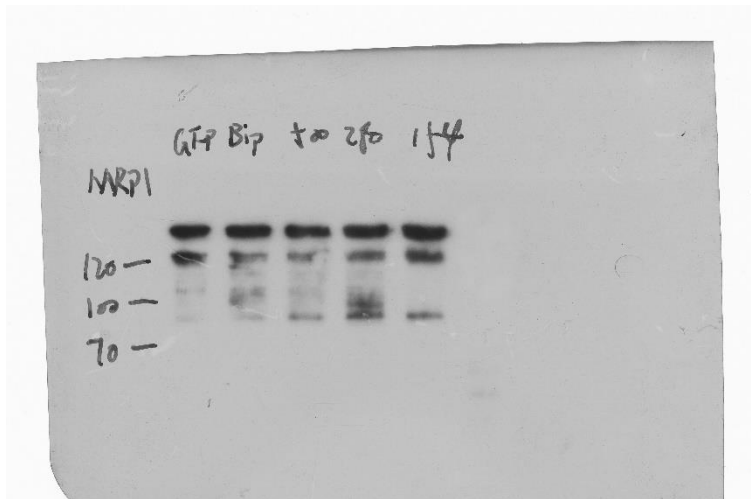

DLD1-input-MRP1

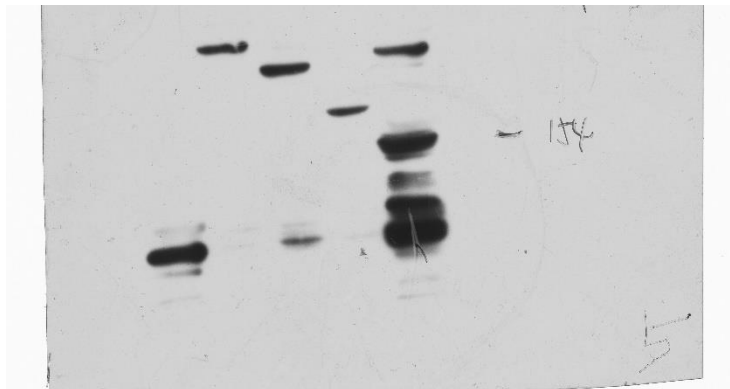

SW480-GRP78

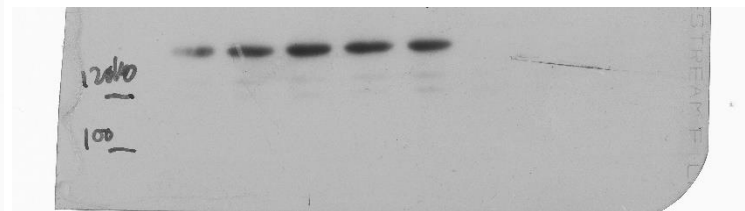

SW480-input-MRP1

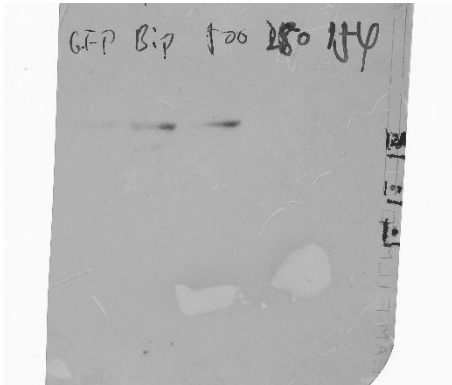

SW480-MRP1

Fig 7I

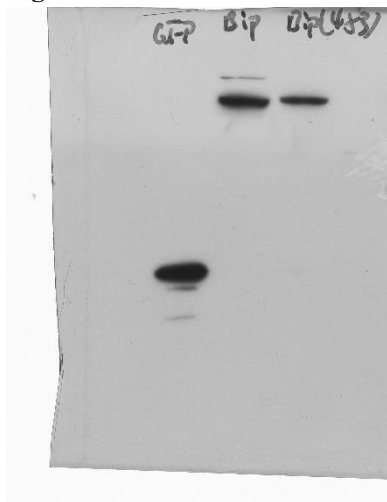

GRP78

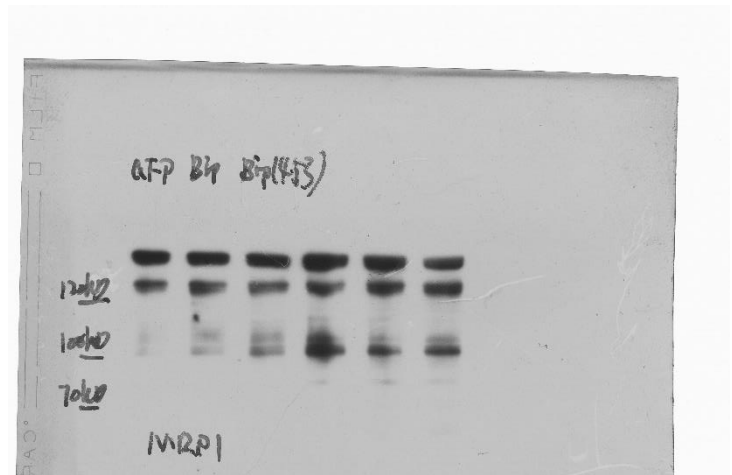

input-MRP1

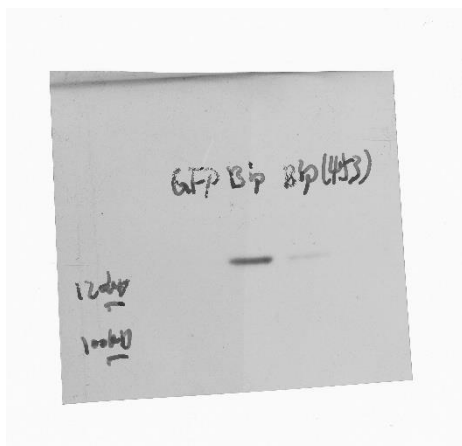

MRP1
